# Supplementary material for: Designing a TiO2-MoO3-BMIMBr nanocomposite by a solvohydrothermal method using an ionic liquid aqueous mixture: an ultra high sensitive acetaminophen sensor
Source: Royal Society of Chemistry journal article supplement (doi:10.1039/d3ra02611f), 2023-01-01
Supplement: d3ra02611f1.pdf [file d3ra02611f1.pdf]

**Designing of TiO<sub>2</sub>-MoO<sub>3</sub>-BMIMBr Composite By a Solvothermal Method using Ionic Liquid  
Aqueous Mixture: An Ultra High Sensitive Acetaminophen sensor**

Anita K. Tawade<sup>1Ψ</sup>, Ajay P. Khairnar<sup>2Ψ</sup>, Jayashri V. Kamble<sup>3</sup>, Akash R. Kadam<sup>3</sup>, Kiran Kumar K. Sharma<sup>1</sup>, Anil A. Powar<sup>4</sup>, Vijay S. Patil<sup>\*2</sup>, Manohar R. Patil<sup>5</sup>, Sawanta S. Mali<sup>6</sup>, Chang Kook Hong<sup>6</sup>, Shivaji N. Tayade<sup>\*3</sup>

<sup>1</sup>School of Nanoscience and Biotechnology, Shivaji University, Kolhapur, 416004, Maharashtra, India

<sup>2</sup>R.F.N.S Senior Science College Akkalkuwa 425415, Maharashtra, India

<sup>3</sup>Department of Chemistry, Shivaji University, Kolhapur, 416004, Maharashtra, India

<sup>4</sup>Department of Chemistry, Walchand College of Engineering, Sangli, 416415, Maharashtra, India

<sup>5</sup>Nanochemistry Research Laboratory G. T. Patil Collage, Nandurbar, 425412, Maharashtra, India

<sup>6</sup>Department of Advanced Chemical Engineering, Chonnam National University, Gwangju, 61186 South Korea.

Ψ Equal first authors

Corresponding Authors 1: [snt\\_chem@unishivaji.ac.in](mailto:snt_chem@unishivaji.ac.in)

Corresponding Authors 2: [patilvs55@gmail.com](mailto:patilvs55@gmail.com)

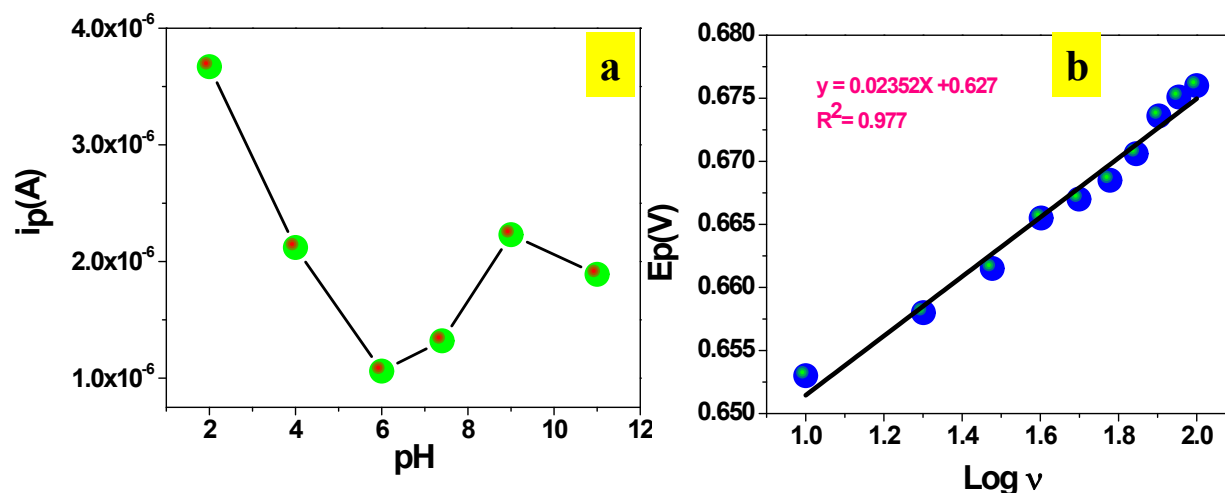

Fig 1S. (a)The effect of peak current with respect to pH of the TiO<sub>2</sub>-MoO<sub>3</sub>-BMIMBr /GCE sensor in 0.1 M AB solution.(b) Dependence of peak potential(Ep) at different scan rates from 10 to 100 mV s<sup>-1</sup> log v.

From Fig. 1S(a) it can be seen that the redox peak current signal decreases with the solution pH ranging from 2 to 6, and beyond this pH range, the increase of the redox peak current signal is observed (7.4 to 11). Considering the determination sensitivity, the pH value of 2 in the AB solution was chosen in the following investigation. Interestingly, the anodic peak potentials shift to more negative values with increasing the pH values as shown in Fig. 1S(a). This observation can be explained by the protons taking part in the electrochemical reactions.<sup>1</sup>

To understand the mechanism of mass transport and electron transfer, it is necessary to consider the effect of scan rate. Fig. 1S(b) shows CVs recorded at a different scan rate from 10 to 100 mV s<sup>-1</sup> in 0.1 M PBS, pH 2 containing 124.3 nM of POM. The plot Ep(V) versus the log (scan rate) obtained at the modified electrode(Fig. S(b) showed good linearity, with the following linear regression equation: Ep = 0.023log (v) + 0.627. The slope obtained is almost one unity, indicating that the electro oxidation of POM at the TiO<sub>2</sub>-MoO<sub>3</sub>-BMIMBr/GCE was completely adsorption-controlled process. Therefore, the current might be proportional to the scan rate according to equation (1)

To determine number of transferred of electrons in POM:

$$E_p = 2.303RT/2(1 - \alpha)nF \log v + K \dots \dots \dots \text{eq(1)}$$

$$\text{Slope} = \frac{2.303 RT}{2(1 - \alpha)nF}$$

$$n = \frac{2.303 \times 8.314 \times 298}{2 \times 0.5 \times 0.023 \times 96500}$$

$$n = 2.6$$

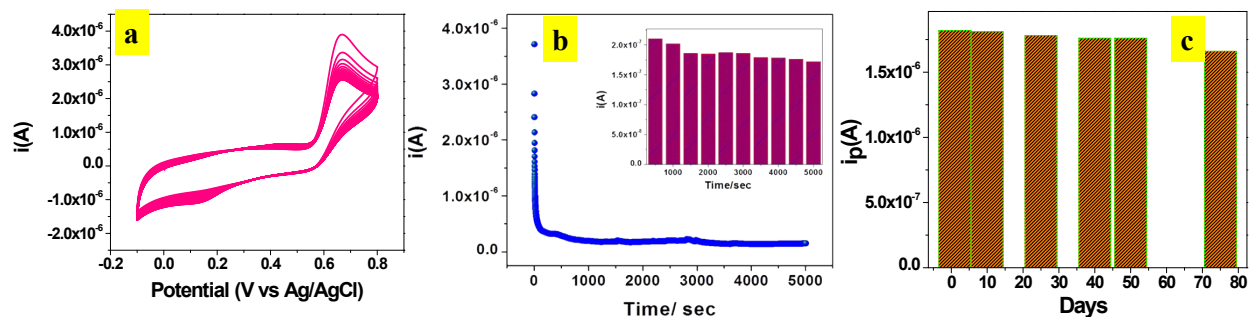

Fig. 2S. (a) Repeatability study using CV for 100 repetitive measurements with 124.3 nM POM and (b) Amperometric stability study for the  $\text{TiO}_2\text{-MoO}_3\text{-BMIMBr}$  /GCE with 124.3 nM POM addition. Insert shows flow chart plot of amperometric current (500 s interval) vs time. (c) Flow chart of peak current vs days

## References

- 1 A. Kutluay and M. Aslanoglu, *Sensors Actuators, B Chem.*, 2013, **185**, 398–404.
